# Supplementary material for: Effects of Different Carbon Sources on Fumonisin Production and FUM Gene Expression by Fusarium proliferatum
Source: PubMed Central journal article supplement (PMC6563204; doi:10.3390/toxins11050289), 2019-05-22
Supplement: toxins-11-00289-s001.pdf [file toxins-11-00289-s001.pdf]

## Supplementary Materials: Effects of Different Carbon Sources on Fumonisin Production and *FUM* Gene Expression by *Fusarium Proliferatum*

Yu Wu, Taotao Li, Liang Gong, Yong Wang and Yueming Jiang

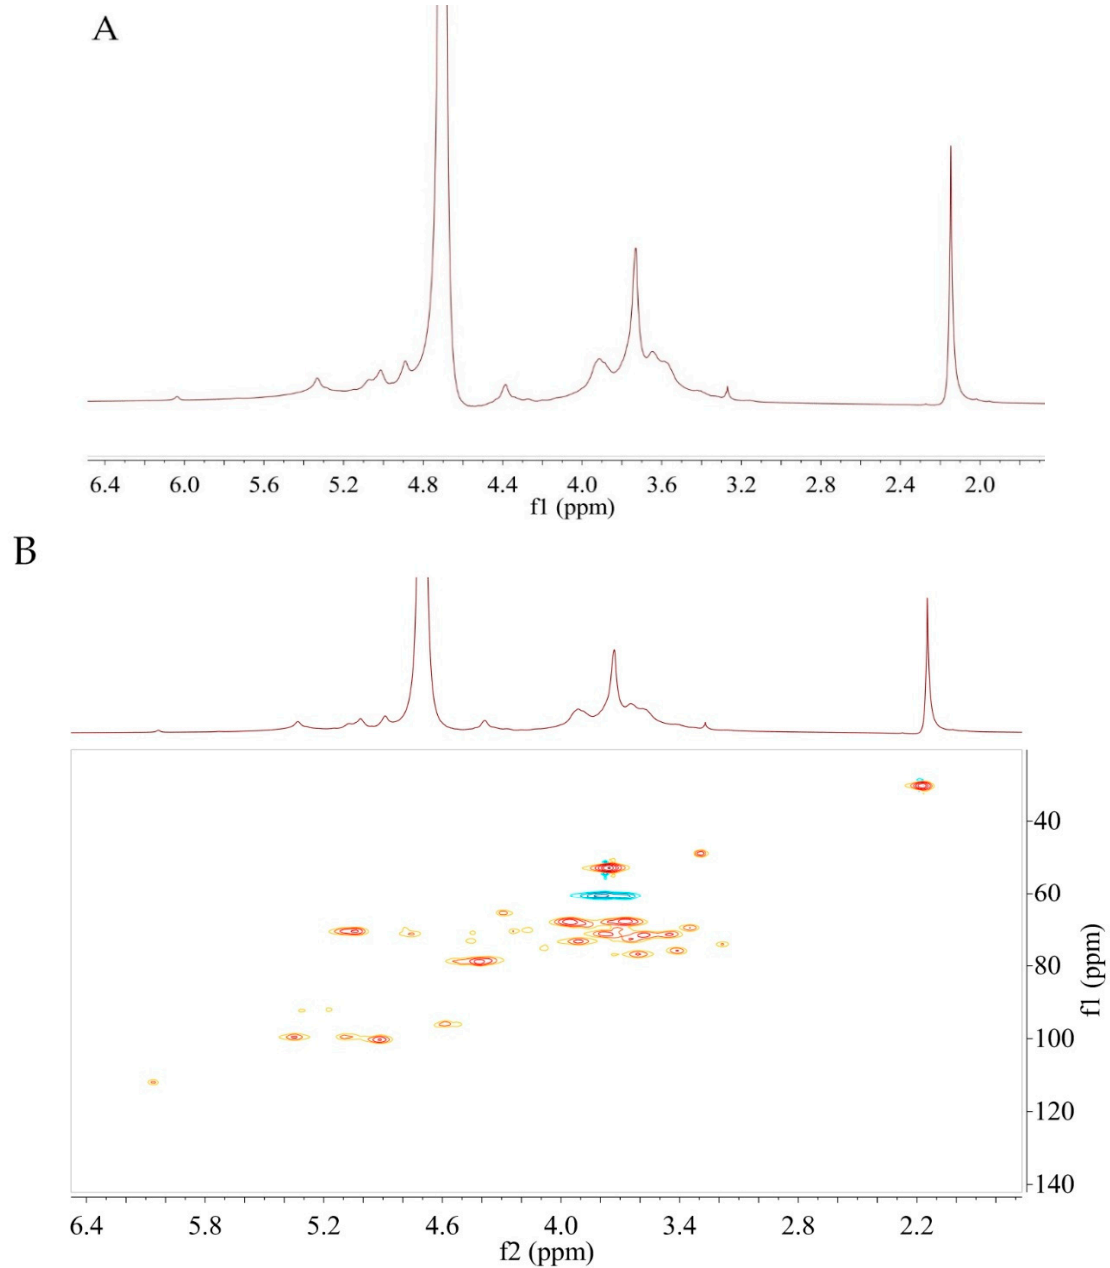

**Figure S1.** NMR spectra of unripe banana peel polysaccharides. (A)  $^1\text{H}$  spectra; (B) HSQC Spectra.

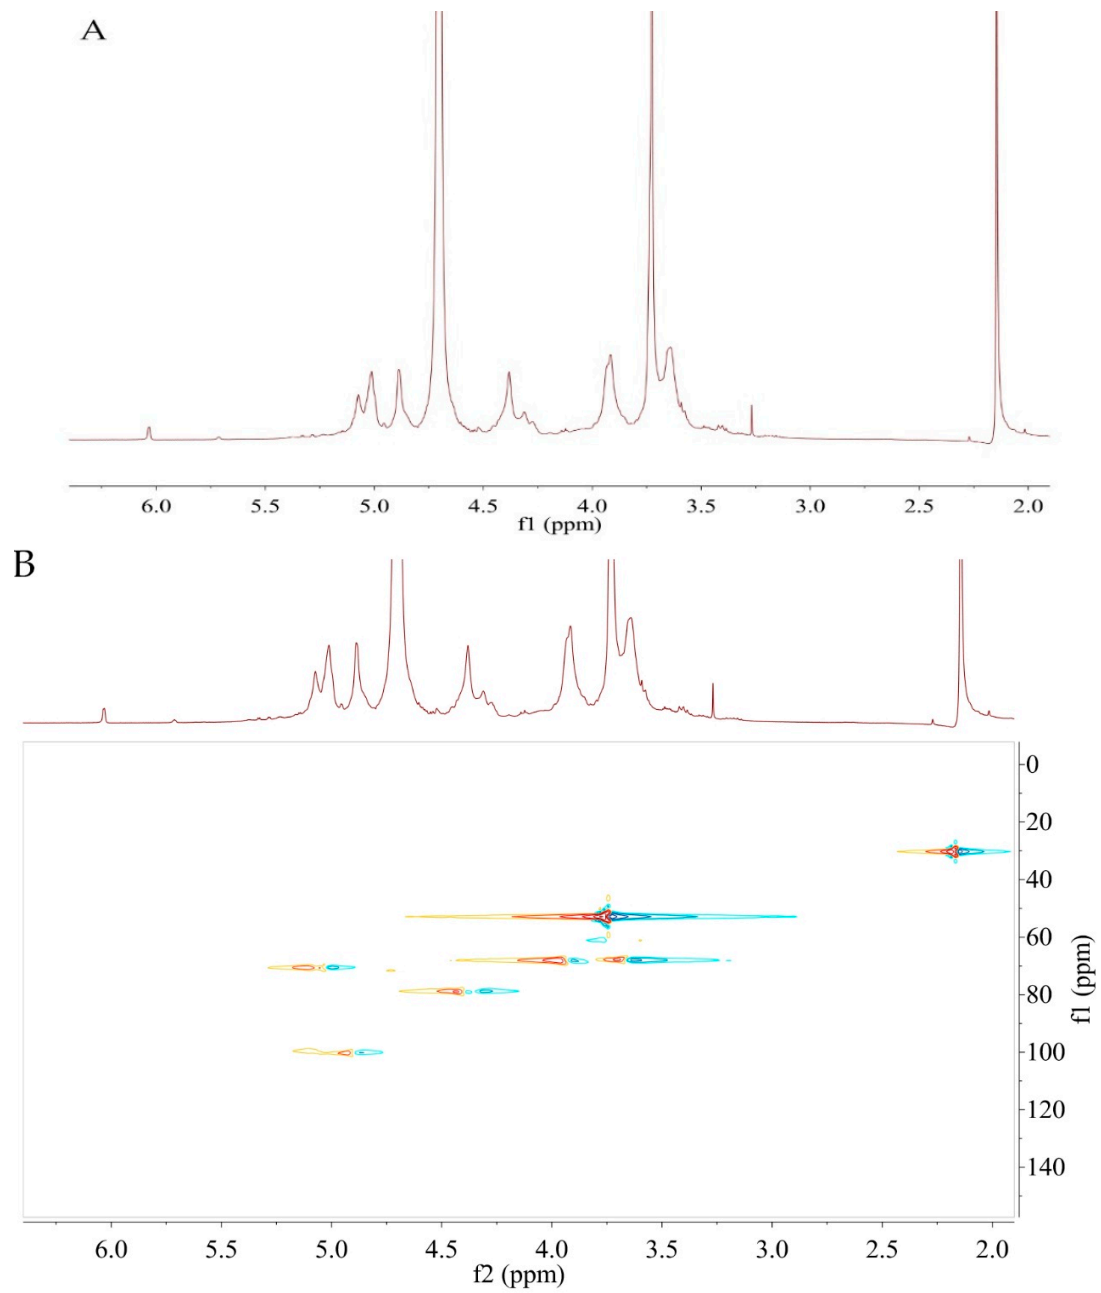

**Figure S2.** NMR spectra of ripe banana peel polysaccharides. (A) <sup>1</sup>H spectra; (B) HSQC Spectra.
